# Supplementary material for: Peptides from the Variable Region of Specific Antibodies Are Shared among Lung Cancer Patients
Source: PLoS One. 2014 May 1;9(5):e96029. doi: 10.1371/journal.pone.0096029 (PMC4006902; doi:10.1371/journal.pone.0096029)
Supplement: Table S1 — Clinical characteristics of the NELSON 1 and NELSON 2 sample sets. (XLS) [file pone.0096029.s005.xls]

## Sheet: Suppl Table S1
Supplementary Table S1. Clinical characteristics of the NELSON 1 and NELSON 2 sample sets.
	NELSON 1					NELSON 2
	Cases		Controls		p-value	Cases		Controls		p-value
	n=25		n=29			n=19		n=20
Gender					0.847					0.589
Male	22	0.88	26	0.897		16	84.2%	18	90.0%
Female	3	0.12	3	0.103		3	15.8%	2	10.0%
Age (years)	62	(±6.5)	62.2	(±4.8)	0.754	62.2	(±7.3)	62.2	(±6.8)	0.944
Men	61.8	(±6.6)	62.5	(±5.0)	0.611	63.3	(±7.4)	63.3	(±6.2)	1
Women	63.3	(±6.8)	60	(±1.7)	0.637	56.7	(±3.5)	52.5	(±0.7)	0.139
Smoking statusa					0.389					<0.001
Current	15	0.6	14	0.483		10	52.6%	0	0.0%
Former	10	0.4	15	0.517		9	47.4%	20	100.0%
Smoking duration (years)					0.108					0.308
26-40	14	0.56	11	0.379		12	0.632	11	0.55
41-45	6	0.24	15	0.517		4	0.211	8	0.4
> 45	5	0.2	3	0.103		3	0.158	1	0.05
Cigaretes/day					0.891					0.355
0-15	5	0.2	6	0.207		3	0.158	8	0.4
16-20	8	0.32	7	0.241		2	0.105	2	0.1
21-25	5	0.2	8	0.276		4	0.211	4	0.2
> 25	7	0.28	8	0.276		10	0.526	6	0.3
COPDa					0.641					0.024
Yes	10	0.4	12	0.414		5	0.263	0	0.0%
No	14	0.56	14	0.483		13	0.684	20	100.0%
Unknown	1	0.04	3	0.103		1	0.053	0	0.0%
Asbestos exposure					0.542					0.676
Yes	5	0.2	4	0.138		2	10.5%	3	15.0%
No	20	0.8	25	0.862		17	89.5%	17	85.0%
Center					0.275					0.158
Groningen	4	0.16	9	0.31		4	0.211	7	0.35
Utrecht	9	0.36	12	0.414		4	0.211	6	0.3
Haarlem	11	0.44	6	0.207		7	0.368	7	0.35
Leuven	1	0.04	2	0.069		4	0.211	0	0
Time to cancer (years)b
0-0.5	11	0.44	-	-		12	0.632	-	-
0.5-1.5	7	0.28	-	-		4	0.21	-	-
1.5-2.5	6	0.24	-	-		3	0.158	-	-
2.5-3.5	1	0.04	-	-		0	0	-	-
Histology
Adenocarcinoma	21	0.84	-	-		8	0.421	-	-
Squamous cell carcinoma	4	0.16	-	-		2	0.105	-	-
Otherc	0	0	-	-		9	0.474	-	-
Pathological stage
IA	19	0.76	-	-		6	0.316	-	-
IB	3	0.12	-	-		0	0	-	-
II	3	0.12	-	-		2	0.105	-	-
III	0	0	-	-		8	0.421	-	-
IV	0	0	-	-		3	0.158	-	-
VDT (Days)
> 600	0	0	-	-		0	0	-	-
400-600	4	0.16	-	-		1	0.053	-	-
<400	7	0.28	-	-		6	0.316	-	-
Not applicabled	14	0.56	-	-		13	0.684	-	-
Volume (mm3)
< 50	0	0	-	-		0	0.158	-	-
50-500	6	0.24	-	-		3	0.789	-	-
> 500	19	0.76	-	-		15	0.794	-	-
Unknown	0	0	-	-		1	0.053	-	-
Consistency
Solid	21	0.84	-	-		17	0.894	-	-
Partial solid	3	0.12	-	-		1	0.053	-	-
Non-solid	0	0	-	-		0	0	-	-
Unknown	1	0.04	-	-		1	0.053	-	-
Benign nodules					0.94					0.861
0	14	0.56	16	0.552		10	0.526	12	0.6
1	5	0.2	5	0.172		4	0.211	3	0.15
>1	6	0.24	8	0.276		5	0.263	5	0.25
COPD: Chronic Obstructive Pulmonary Disease; VDT: Volume Doubling Time; significance of all characteristics were tested by chi-square except for age (Mann-Whitney U test); a Significantly different in NELSON 2 sample set; b interval between blood sampling and diagnosis; c NSCLC histology other than adeno- or squamous cell carcinoma; d no repeat scan, no growth (decrease in size or resolution).
