# Supplementary material for: Peptides from the Variable Region of Specific Antibodies Are Shared among Lung Cancer Patients
Source: PLoS One. 2014 May 1;9(5):e96029. doi: 10.1371/journal.pone.0096029 (PMC4006902; doi:10.1371/journal.pone.0096029)
Supplement: Table S2 — A–D. R-square of all reference and clinical samples of NELSON 1 and NELSON 2. (XLS) [file pone.0096029.s006.xls]

## Sheet: Suppl Table S2
Supplementary Table S2A-D. R-square of all reference and clinical samples of NELSON 1 and NELSON 2.
Table S2A. Reference sample NELSON 1					Table S2B.Reference sample NELSON 2					Table S2C. Clinical samples NELSON 1						Table S2D. Clinical samples NELSON 2
Sample ID	Min R2	Median R2			Sample ID	Min R2	Median R2			Sample ID	Case/Control	Min R2	Median R2			Sample ID	Case/Control	Min R2	Median R2
Ref1	0.913037	0.967969			Ref1	0.184433	0.895919			Fab1	Cases	0.00174148	0.79999			Fab100	Cases	0.113341	0.691572
Ref2	0.904608	0.963763			Ref2	0.113536	0.164177			Fab2	Controls	0.000693498	0.76104			Fab101	Cases	0.211249	0.464425
Ref3	0.927538	0.974702			Ref3	0.145987	0.200869			Fab3	Controls	0.00215369	0.828413			Fab102	Controls	0.141785	0.622823
Ref4	0.85595	0.932021			Ref4	0.113536	0.909073			Fab4	Cases	0.00369071	0.806403			Fab103	Cases	0.0459137	0.306084
Ref5	0.921106	0.959083			Ref5	0.170106	0.960442			Fab5	Controls	0.00104276	0.770097			Fab104	Cases	0.0567961	0.357509
Ref6	0.906545	0.980589			Ref6	0.164177	0.96671			Fab6	Controls	0.000943216	0.715568			Fab105	Controls	0.094998	0.559371
Ref7	0.925167	0.963728			Ref7	0.115241	0.171125			Fab8	Controls	0.00517378	0.758472			Fab106	Controls	0.197783	0.768608
Ref8	0.915698	0.977325			Ref8	0.151931	0.977308			Fab9	Controls	0.000388148	0.6769			Fab107	Cases	0.021104	0.590514
Ref9	0.860308	0.935595			Ref9	0.126891	0.950911			Fab10	Controls	0.00812779	0.729014			Fab108	Cases	0.12079	0.582885
Ref10	0.925141	0.979149			Ref10	0.146587	0.960442			Fab11	Cases	0.00399345	0.779314			Fab109	Controls	0.0761594	0.6861
Ref11	0.841906	0.960474			Ref11	0.152919	0.960456			Fab12	Controls	0.00209284	0.820768			Fab110	Controls	0.0948973	0.799153
Ref12	0.849067	0.965209								Fab13	Cases	0.00824488	0.780636			Fab111	Cases	0.0960747	0.748324
Ref13	0.841906	0.923123			All median and minimal r-squares are shown for each reference sample of NELSON 2 dataset. Reference sample measured 11 times during the measurement of NELSON 2 set.					Fab14	Controls	0.00103219	0.620659			Fab112	Controls	0.118815	0.790957
Ref14	0.885449	0.95369								Fab15	Cases	0.00171701	0.820459			Fab114	Cases	0.122411	0.76727
										Fab17	Controls	0.0142509	0.692826			Fab115	Cases	0.104671	0.761767
All median and minimal r-squares are shown for each reference sample of NELSON 1 dataset. Reference sample measured 14 times during the measurement of NELSON 1 set.										Fab19	Cases	0.000546825	0.669221			Fab116	Cases	0.0643232	0.412825
										Fab20	Cases	0.0137864	0.58429			Fab117	Cases	0.00378846	0.508317
										Fab21	Cases	0.00737955	0.750918			Fab118	Controls	0.246841	0.539075
										Fab23	Cases	1.48314e-06	0.113293			Fab119	Controls	0.120385	0.585005
										Fab24	Controls	0.00191761	0.811824			Fab120	Controls	0.11314	0.736346
										Fab25	Controls	0.00436589	0.463599			Fab121	Controls	0.18078	0.691069
										Fab26	Controls	0.00711197	0.625501			Fab122	Controls	0.160113	0.790574
										Fab27	Cases	0.000573449	0.631769			Fab123	Controls	0.195446	0.812797
										Fab28	Cases	0.000662378	0.0100725			Fab124	Controls	0.0727197	0.701753
										Fab29	Cases	0.0121902	0.701968			Fab125	Cases	0.0533123	0.365744
										Fab30	Controls	0.0108825	0.418838			Fab128	Cases	0.219481	0.769324
										Fab31	Controls	0.00283784	0.774142			Fab129	Cases	0.00748787	0.355468
										Fab32	Cases	2.32133e-06	0.654174			Fab130	Controls	0.131354	0.825161
										Fab33	Cases	0.00824296	0.666745			Fab131	Cases	0.135947	0.51385
										Fab34	Cases	0.0169517	0.551513			Fab132	Controls	0.0346134	0.294055
										Fab36	Controls	0.00637679	0.791289			Fab133	Cases	0.19922	0.815786
										Fab39	Cases	0.00883973	0.664842			Fab134	Cases	0.155816	0.690924
										Fab40	Controls	0.0044248	0.635543			Fab135	Controls	0.00339963	0.517577
										Fab41	Cases	0.00316351	0.774256			Fab136	Controls	0.171973	0.645919
										Fab42	Controls	0.00407594	0.832518			Fab137	Controls	0.183626	0.651139
										Fab43	Controls	0.00941372	0.658317			Fab138	Cases	0.090608	0.765812
										Fab44	Cases	6.39594e-06	0.74059			Fab139	Controls	0.134921	0.668608
										Fab45	Controls	0.0123333	0.719334			Fab141	Cases	0.0892804	0.702819
										Fab46	Controls	0.0154333	0.493941			Fab142	Cases	0.173414	0.717586
										Fab48	Controls	0.00214612	0.721992			Fab143	Controls	0.158696	0.710732
										Fab49	Cases	7.30446e-05	0.273002			Fab144	Cases	0.150655	0.799194
										Fab50	Controls	1.48314e-06	0.685721			Fab146	Cases	0.0654129	0.761106
										Fab51	Cases	0.000146956	0.73521			Fab147	Controls	0.0923907	0.721108
										Fab52	Cases	0.00291067	0.836566			Fab148	Cases	0.00247559	0.507019
										Fab53	Cases	0.00114748	0.735636			Fab149	Cases	0.161493	0.757924
										Fab54	Cases	0.00358924	0.470031			Fab150	Cases	0.18362	0.78258
										Fab55	Controls	0.00157491	0.668099			Fab151	Controls	0.187742	0.677108
										Fab56	Controls	0.00184361	0.805033			Fab152	Cases	0.22386	0.636374
										Fab57	Cases	0.00172861	0.744679			Fab153	Controls	0.0526461	0.643987
										Fab58	Controls	0.00197601	0.816398			Fab155	Cases	0.0783875	0.818066
										Fab59	Cases	0.000844474	0.724329			Fab156	Controls	0.159309	0.745578
										Fab60	Controls	0.00255713	0.820263			Fab158	Controls	0.0729768	0.770103
										Fab61	Controls	7.30446e-05	0.00289001			Fab159	Controls	0.0617783	0.804006
										Fab62	Cases	0.00279382	0.75442			Fab160	Cases	0.037346	0.722397
										Fab63	Cases	0.000950502	0.704116			Fab161	Controls	0.100652	0.762312
										Fab64	Controls	0.000254171	0.781227			Fab162	Cases	0.177819	0.808591
										Fab65	Cases	0.00219329	0.753126			Fab163	Cases	0.089207	0.818973
										Fab66	Cases	9.38879e-06	0.659626			Fab164	Cases	0.190508	0.778681
										Fab67	Controls	0.00471199	0.776323			Fab166	Controls	0.00247559	0.153236
										Fab68	Controls	0.000662378	0.737042			Fab167	Controls	0.0997519	0.791227
										Fab69	Controls	0.000850963	0.104393			Fab168	Controls	0.113019	0.811221
										Fab70	Controls	0.00369549	0.745903			Fab169	Cases	0.0571167	0.768947
										Fab71	Cases	0.00299113	0.806611			Fab170	Controls	0.113742	0.765764
										Fab72	Cases	0.00231013	0.819303			Fab171	Controls	0.1867	0.798384
										Fab73	Controls	0.00227888	0.837059			Fab172	Cases	0.103337	0.798745
										Fab74	Cases	0.00142006	0.676395			Fab173	Controls	0.0805538	0.503589
										Fab75	Cases	0.00194769	0.740222			Fab174	Controls	0.203354	0.771954
										Fab76	Controls	0.00327561	0.646535			Fab175	Controls	0.182139	0.799834
										Fab77	Controls	0.00323864	0.774096			Fab176	Controls	0.0572347	0.669883
										Fab79	Cases	0.00512053	0.570898			Fab177	Cases	0.00948676	0.469082
										Fab80	Controls	0.000522205	0.736797			Fab178	Controls	0.0228385	0.58814
										Fab81	Controls	0.00730226	0.77661			Fab179	Controls	0.176245	0.671213
										Fab84	Controls	0.00230716	0.826186
										Fab85	Cases	0.00439824	0.781871			All median and minimal r-squares are shown for each clinical sample of NELSON 2 dataset.
										Fab86	Controls	0.00159694	0.798933
										Fab87	Cases	0.00135597	0.789895
										Fab88	Controls	0.00255472	0.824532
										Fab89	Cases	8.49839e-05	0.681735
										Fab90	Cases	0.0054336	0.764396
										Fab91	Cases	0.00214535	0.804751
										Fab92	Controls	0.00150662	0.831424
										Fab93	Cases	0.00259235	0.803936
										Fab94	Controls	6.79708e-05	0.740985
										All median and minimal r-squares are shown for each clinical sample of NELSON 1 dataset.
