# Supplementary material for: Peptides from the Variable Region of Specific Antibodies Are Shared among Lung Cancer Patients
Source: PLoS One. 2014 May 1;9(5):e96029. doi: 10.1371/journal.pone.0096029 (PMC4006902; doi:10.1371/journal.pone.0096029)
Supplement: Table S4 — Raw abundance of the 12 antibody peptides in the NELSON 1 and NELSON 2 dataset. (XLS) [file pone.0096029.s008.xls]

## Sheet: Suppl Table S4
Supplementary Table S4. Raw abundance of the 12 antibody peptides in the NELSON 1 and NELSON 2 dataset.
Peptide	NELSON 1 Cases		NELSON 1 Controls		NELSON 2 Cases		NELSON 2 Controls
	Average	sd	Average	sd	Average	sd	Average	sd
1	1701.31	5888.41	10196.8	19906.8	1422.22	4277.55	0	0
2	275.878	963.144	2038.18	3092.87	763.199	1982.93	238.424	733.93
3	4897.69	11104.4	12930.7	15953	41390.2	31814.8	36292	15102
4	34163.7	38610	12094.7	24433.5	32430.9	35946.9	26051.7	54011.5
5	26310.4	42422.3	7932.5	12366.3	21210.9	37830.6	15743.7	14219.4
6	11147.9	11824.8	4608.94	7388.9	283.662	919.878	0	0
7	19214.3	38432.6	3750.52	9130.18	25030.3	36669.8	11815.8	19427.1
8	1643.33	3727.87	5577.08	8135.74	1681.24	5137.07	2928.61	4511.53
9	0	0	12530.4	29006.1	162081	223608	112691	124157
10	286836	371340	594518	596352	289530	281416	139753	173122
11	49312	44074.8	84649.1	74264.4	6961.86	14581.9	6646.72	9834.51
12	92368.1	81068.9	44647	54327.5	49206.7	53980.9	32905.8	25660.9
The average raw abundance and standard deviation of the cases and controls from the NELSON 1 and NELSON 2 dataset are shown for each peptide from the antibody peptide model. Green marking: average raw abundance higher compared to that in the other group within the dataset; Red marking: average raw abundance lower compared to that in the other group within the dataset.
